# Supplementary material for: Widespread and extensive lengthening of 3′ UTRs in the mammalian brain
Source: HighWire-hosted journal article supplement (doi:10.1101/gr.146886.112), 2013-03-21
Supplement: Supp_Table_S7.xlsx [file Supp_Table_S7.xlsx]

## Sheet: Sheet1
Mouse Extended 3'UTR Coordinate	Orthologous Human Extension Coordinate	Orthologous Human Ensembl Coordinate
chr10:45089113-45092291		chr6:105544697-105544697
chr10:57956714-57958265		chr2:109402267-109402267
chr10:61043030-61045551		chr10:72058729-72058729
chr10:64465579-64475297	chr10:67672266-67672266
chr10:84477930-84481075		chr12:107283090-107283090
chr10:102008698-102012371	chr12:86194531-86194531
chr10:107714347-107716897		chr12:80167343-80167343
chr11:6305098-6307190		chr7:44809477-44809477
chr11:29061481-29062412		chr2:55862229-55862229
chr11:30792717-30796054	chr2:54075992-54075992
chr11:32416485-32418853		chr5:171636644-171636644
chr11:35521642-35525550		chr5:168088745-168088745
chr11:43533734-43536351	chr5:159502446-159502446
chr11:44226736-44228179		chr5:158741791-158741791
chr11:53000443-53005943	chr5:132529074-132529074
chr11:57623570-57628399	chr5:153840630-153840630
chr11:60883967-60886771	chr17:21323167-21323167
chr11:70586210-70589736		chr17:4999668-4999668
chr11:77523235-77531465		chr17:27582855-27582855
chr11:77968803-77970986		chr17:27082996-27082996
chr11:82775204-82778373	chr17:33600668-33600668
chr11:98111701-98114841		chr17:37690799-37690799
chr11:101628171-101630272		chr17:41604154-41604154
chr11:115291667-115294390		chr17:73061979-73061979
chr12:3502370-3510697	chr2:25956616-25956616
chr12:3781279-3788573		chr2:25592042-25592042
chr12:4785012-4785623		chr2:24338241-24338241
chr12:4863729-4866240		chr2:24252217-24252217
chr12:5050851-5054221		chr2:23971534-23971534
chr12:25644023-25649261		chr2:8992820-8992820
chr12:25746140-25748037		chr2:8865408-8865408
chr12:34057769-34061254	chr7:105244840-105244840
chr12:39357275-39361177		chr7:14184674-14184674
chr12:39592354-39597069		chr7:13930853-13930853
chr12:53668323-53672990		chr14:32628934-32628934
chr12:54248894-54256605	chr14:33306964-33306964
chr12:66025328-66027012		chr14:45376460-45376460
chr12:72198589-72200331		chr14:58840448-58840448
chr12:73894726-73900827		chr14:60765805-60765805
chr12:81597982-81600925	chr14:69710563-69710563
chr12:82764580-82768560		chr14:71142077-71142077
chr12:84258956-84263029	chr14:73033117-73033117
chr12:85075019-85079414		chr14:73690399-73690399
chr12:86979906-86984854		chr14:75940814-75940814
chr12:88430368-88432779		chr14:77725838-77725838
chr12:106830888-106833443		chr14:96710501-96710501
chr12:110053863-110058369		chr14:100749129-100749129
chr12:112107286-112108212		chr14:102809039-102809039
chr12:118994552-118998228		chr7:22157909-22157909
chr13:9170186-9173716		chr10:855484-855484
chr13:13869444-13871091		chr1:235824341-235824341
chr13:16118960-16123455		chr7:41724712-41724712
chr13:34993463-34997955		chr6:4065217-4065217
chr13:75269765-75272840		chr5:95726119-95726119
chr13:77169210-77172552		chr5:94039446-94039446
chr13:81808820-81811847		chr5:89811444-89811444
chr13:100016524-100020592	chr5:71735758-71735758
chr13:104147782-104149256		chr7:13934006-13934006
chr13:105283782-105286776		chr5:64444563-64444563
chr13:118061867-118067097	chr5:49689336-49689336
chr5:3520789-3531028		chr7:92234235-92234235
chr5:3569071-3570551		chr7:92190107-92190107
chr5:16124809-16128659		chr7:81328322-81328322
chr5:58520588-58524493	chr4:31148442-31148442
chr5:65220395-65224161		chr4:38702663-38702663
chr5:72528046-72540830	chr4:47440985-47440985
chr5:105915092-105919111		chr1:90063423-90063423
chr5:123616013-123618655		chr12:122270562-122270562
chr5:130321694-130322322		chr7:56131313-56131313
chr5:131315278-131323286		chr7:71244476-71244476
chr5:145998113-145999039		chr7:99162328-99162328
chr5:146052026-146053120		chr7:99228527-99228527
chr5:147281951-147285212		chr13:27263085-27263085
chr6:7821255-7825707		chr7:7288251-7288251
chr6:17237098-17239705		chr7:116148595-116148595
chr6:34346652-34347472		chr7:134264592-134264592
chr6:47248611-47254200		chr7:148118090-148118090
chr6:48795142-48797038		chr12:9392582-9392582
chr6:53644079-53650360		chr7:28865511-28865511
chr6:65654437-65662328	chr4:121950506-121950506
chr6:70676749-70677350		chr2:89156674-89156674
chr6:86221947-86225711		chr2:70674412-70674412
chr6:99643810-99645081		chr3:71805647-71805647
chr6:100816568-100819939		chr3:73118350-73118350
chr6:121220533-121222736		chr22:18660164-18660164
chr6:139916462-139917817		chr12:18801348-18801348
chr6:140544802-140545619		chr12:19529331-19529331
chr6:141447412-141455500	chr12:20841522-20841522	chr12:20837315-20837315
chr7:3435656-3436347		chr19:54515918-54515918
chr7:17547383-17549973		chr19:46969750-46969750
chr7:24927283-24928218		chr19:44790501-44790501
chr7:29252500-29253240		chr19:39797208-39797208
chr7:67300987-67301703		chr17:74267375-74267375
chr7:71898026-71899483		chr15:29410518-29410518
chr7:75371285-75378575		chr15:99507759-99507759
chr7:79819162-79819746		chr12:49047199-49047199
chr7:96556868-96561668		chr11:86656721-86656721
chr7:97592823-97597324	chr11:85369751-85369751
chr7:99593125-99597731		chr11:83166055-83166055
chr7:99984447-99993077		chr11:82684175-82684175
chr7:114733943-114736078		chr11:7532608-7532608
chr7:117285624-117291424		chr11:9615004-9615004
chr7:124811134-124817115	chr16:17196170-17196170
chr7:132776503-132779555		chr16:27463362-27463362
chr7:144319775-144321863		chr10:131567699-131567699
chr7:151607038-151611959		chr11:70313961-70313961
chr8:10035439-10035955		chr13:108959385-108959385
chr8:27273269-27274641		chr8:42691817-42691817
chr8:35881835-35885028		chr8:29190581-29190581
chr8:47723500-47725059		chr4:185548850-185548850
chr8:48178551-48182102	chr4:185007088-185007088
chr8:58604147-58608882		chr4:175558065-175558065
chr8:84646632-84651824		chr4:142944313-142944313
chr8:107119017-107122938	chr16:66925016-66925016
chr8:109535500-109543534		chr16:69342955-69342955
chr8:119728226-119739918	chr16:81424432-81424432
chr8:131026712-131030225	chr10:33465293-33465293
chr9:3894709-3905806	chr11:106544724-106544724
chr9:13609978-13611734		chr11:95566046-95566046
chr9:14130148-14137566		chr11:94898704-94898704
chr9:19452490-19454212		chr19:9274090-9274090
chr9:31186126-31189306		chr11:129769612-129769612
chr9:38549356-38556216		chr10:124750322-124750322
chr9:45561245-45561862		chr11:117298489-117298489
chr9:53185606-53189278		chr11:108376158-108376158
chr9:58708568-58710987		chr15:73612200-73612200
chr9:64928658-64932325		chr15:65734801-65734801
chr9:65033139-65034840		chr15:65619465-65619465
chr9:65177709-65179898		chr15:65440557-65440557
chr9:67843194-67845554		chr15:62144592-62144592
chr9:69854920-69859472		chr15:59951345-59951345
chr9:79991667-79994352		chr6:76427994-76427994
chr9:83490841-83495524	chr6:80414019-80414019	chr6:80413372-80413372
chr9:99568220-99570371		chr3:137780832-137780832
chr9:108649323-108652787		chr3:48784012-48784012
chrX:8842809-8848333		chrX:37543716-37543716
chrX:12756718-12760561	chrX:41095844-41095844
chrX:54476762-54477731		chrX:135742549-135742549
chrX:72639724-72645481		chrX:154288578-154288578
chrX:103319952-103323509		chrX:77305892-77305892
chrX:136286378-136288772		chrX:106119375-106119375
chrX:147904271-147908696		chrX:54094757-54094757
chrX:149827409-149833471	chrX:56317929-56317929
chr15:4524875-4531489		chr5:41307056-41307056
chr15:6613170-6615654		chr5:39105338-39105338
chr15:8107762-8110944		chr5:37288239-37288239
chr15:9126470-9132249		chr5:36098514-36098514
chr15:23404171-23406074	chr5:19470935-19470935
chr15:34070515-34073644		chr8:98740998-98740998
chr15:34769679-34773171		chr8:99445076-99445076
chr15:44267232-44269784		chr8:110358181-110358181
chr15:44471966-44473075		chr8:110578225-110578225
chr15:68923420-68931978		chr8:136668965-136668965
chr15:75428552-75429930		chr8:144299044-144299044
chr15:79943686-79944766		chr22:39774386-39774386
chr15:81283459-81287925		chr22:41328819-41328819
chr15:85293351-85294826		chr22:46241187-46241187
chr15:89116575-89117573		chr22:50883514-50883514
chr15:95803130-95805901		chr12:45826134-45826134
chr15:101041291-101044159		chr12:52390862-52390862
chr15:103074443-103077148		chr12:54680872-54680872
chr14:45899753-45902084		chr14:53104431-53104431
chr14:54842770-54843901		chr14:23021083-23021083
chr14:55059507-55061168		chr14:23316970-23316970
chr14:57578742-57581341		chr13:20663253-20663253
chr14:60999100-61007047		chr13:25735822-25735822
chr14:63575144-63580364	chr13:52340949-52340949
chr14:65425131-65428471		chr8:28924796-28924796
chr14:66483994-66487348		chr8:27590835-27590835
chr14:67350413-67358917	chr8:26611332-26611332
chr14:68046957-68049766		chr8:25699246-25699246
chr14:70479710-70482442		chr8:22545172-22545172
chr14:75106202-75109301	chr13:47405677-47405677
chr14:75925922-75929530		chr13:46353363-46353363
chr14:80028758-80035036	chr13:53275050-53275050
chr14:84933362-84937385		chr13:58303445-58303445
chr14:99712546-99714266		chr13:73651676-73651676
chr14:116923657-116924430		chr13:93519490-93519490
chr14:120268814-120275651	chr13:97491836-97491836
chr17:6305445-6309125		chr6:159056460-159056460
chr17:12254517-12256235		chr6:161768452-161768452
chr17:27107588-27109387		chr6:33421466-33421466
chr17:29631690-29633063		chr6:37143202-37143202
chr17:31251228-31254954		chr21:43720714-43720714
chr17:47496178-47499319		chr6:42192669-42192669
chr17:58549763-58557380	chr2:125678811-125678811
chr17:64488364-64495874		chr5:108532542-108532542
chr17:89044627-89047153		chr2:48825651-48825651
chr16:5183841-5187357		chr16:5069156-5069156
chr16:11755417-11759196		chr16:12668145-12668145
chr16:12267894-12271017		chr16:13334272-13334272
chr16:13148350-13152073		chr16:14046205-14046205
chr16:17483886-17487548		chr22:21308037-21308037
chr16:20123177-20129313	chr3:183402316-183402316
chr16:20532386-20534091		chr3:183891398-183891398
chr16:21928119-21933522		chr3:185206885-185206885
chr16:25876825-25877950		chr3:189599285-189599285
chr16:45127621-45130096	chr3:112315623-112315623
chr16:81623696-81628898		chr21:22915650-22915650
chr19:16457882-16463029		chr9:80331003-80331003
chr19:18778609-18781397		chr9:77595936-77595936
chr19:23063304-23069922	chr9:73143955-73143955
chr19:23239400-23242924		chr9:72999503-72999503
chr19:36530156-36535462		chr10:93044088-93044088
chr19:37295994-37298956		chr10:94113721-94113721
chr19:37757466-37758563		chr10:94819250-94819250
chr19:41633768-41642155		chr10:98724198-98724198
chr19:42144825-42147691		chr10:99372559-99372559
chr19:44645646-44654791	chr10:102318716-102318716
chr19:56672000-56678005		chr10:115676953-115676953
chr19:56798260-56799878		chr10:115806667-115806667
chr1:12848921-12851277		chr8:70573150-70573150
chr1:32714384-32715397		chr6:62390139-62390139
chr1:40081555-40084756		chr2:102511150-102511150
chr1:55808305-55811203		chr2:199014608-199014608
chr1:59927327-59934473		chr2:203432474-203432474
chr1:60207529-60210767	chr2:203851694-203851694
chr1:62842561-62845893		chr2:206644433-206644433
chr1:65320330-65323383		chr2:209223475-209223475
chr1:75241377-75242310		chr2:220151622-220151622
chr1:82891631-82897596	chr2:228425955-228425955
chr1:102381276-102387182	chr2:125678811-125678811
chr1:118477249-118483907	chr2:125678811-125678811
chr1:132615994-132620950		chr1:207217194-207217194
chr1:167251830-167256897		chr1:168048781-168048781
chr1:174629156-174635679	chr1:159676808-159676808
chr1:180411557-180416287	chr1:245253762-245253762	chr1:245255108-245255108
chr18:8694537-8697097		chr16:1413206-1413206
chr18:12895270-12897923		chr18:21715573-21715573
chr18:21141684-21145859		chr18:29653176-29653176
chr18:37517262-37518249		chr5:140483406-140483406
chr18:37583664-37585502		chr5:140505201-140505201
chr18:59570098-59570971		chr5:129522327-129522327
chr18:63111930-63113476	chr18:10489517-10489517
chr18:74930101-74933972		chr18:47349156-47349156
chr18:76464382-76471541		chr18:45359466-45359466
chr18:78229844-78234063		chr18:43427574-43427574
chr18:89438471-89441167		chr18:67528097-67528097
chr2:3371079-3372535		chr10:14948897-14948897
chr2:76533557-76535397		chr2:179370093-179370093
chr2:101537654-101543333	chr11:36505317-36505317
chr2:103924803-103926292		chr11:33730446-33730446
chr2:103954335-103956884		chr11:33730246-33730246
chr2:121836362-121841075		chr15:44821236-44821236
chr2:162800256-162802872		chr20:42179590-42179590
chr2:174283381-174284877		chr20:57601709-57601709
chr3:19591597-19592584		chr8:67087720-67087720
chr3:30515733-30519027		chr3:169507504-169507504
chr3:33968007-33974911	chr3:180700944-180700944
chr3:90161922-90167341		chr1:153777201-153777201
chr3:106908520-106917945		chr1:111136202-111136202
chr3:126545677-126549250		chr4:114372188-114372188
chr3:132501033-132504643		chr4:106965474-106965474
chr3:135128202-135131366		chr4:103715540-103715540
chr3:157268196-157273743		chr1:71472542-71472542
chr3:157668832-157671012		chr1:70726271-70726271
chr4:11511347-11512886		chr8:95443388-95443388
chr4:13817032-13822209		chr8:92967203-92967203
chr4:18043366-18052552		chr8:89044237-89044237
chr4:32888196-32889717		chrX:116534044-116534044
chr4:33105771-33111757	chr6:90067514-90067514
chr4:48574123-48578778	chr9:103218668-103218668
chr4:53578290-53585920		chr9:108159627-108159627
chr4:66502511-66507938	chr9:120483144-120483144
chr10:5782031-5785432		chr6:151942328-151942328
chr10:9342723-9348787		chr6:147891157-147891157
chr10:12927508-12934066		chr6:144152322-144152322
chr10:17618828-17622021		chr6:139501939-139501939
chr10:18301631-18309389		chr6:138665800-138665800
chr10:20116865-20120226		chr6:136516709-136516709
chr10:22822756-22826016		chr6:133853257-133853257
chr10:25711006-25712702		chr6:130764208-130764208
chr10:29172219-29173938		chr6:127518910-127518910
chr10:30322980-30328199		chr6:126301387-126301387
chr10:31212986-31222466		chr6:125413779-125413779
chr10:67555283-67559254		chr10:63856703-63856703
chr10:109118323-109121178		chr12:78606790-78606790
chr10:114633909-114636610		chr12:72320629-72320629
chr10:114805435-114809618		chr12:72074419-72074419
chr10:116506473-116510987		chr12:69973559-69973559
chr10:118290584-118296610		chr12:68059186-68059186
chr10:122542052-122550563		chr12:62799899-62799899
chr10:124656308-124665070	chr12:60183632-60183632
chr10:126791742-126794145		chr12:57845842-57845842
chr11:23636840-23642267	chr2:61158741-61158741
chr11:23760171-23763960		chr2:61029220-61029220
chr11:46784558-46792767		chr5:156194499-156194499
chr11:95133631-95137102	chr17:47910585-47910585
chr11:98322192-98328302		chr17:37913968-37913968
chr11:106178842-106180980		chr17:62015914-62015914
chr11:116147434-116150499		chr17:74077087-74077087
chr12:4883567-4887390		chr2:24228483-24228483
chr12:32277197-32281209		chr7:107263762-107263762
chr12:55846395-55847995		chr14:35030618-35030618
chr12:66039820-66044439	chr14:45393581-45393581
chr12:70677717-70678915		chr14:50575360-50575360
chr12:74200615-74204431		chr14:61176246-61176246
chr12:75988494-75998496	chr14:63166166-63166166
chr12:76550429-76554703		chr14:63838075-63838075
chr12:84306167-84316730		chr14:73075742-73075742
chr12:84359693-84361823		chr14:73127757-73127757
chr12:84369300-84370414		chr14:73136660-73136660
chr12:92793682-92798186		chr14:81641796-81641796
chr12:92871432-92878164		chr14:81727000-81727000
chr12:95165166-95166152		chr1:151132224-151132224
chr12:100428273-100434479		chr14:89622516-89622516
chr12:103072201-103075758		chr14:92432335-92432335
chr12:104018984-104023323		chr14:93703896-93703896
chr12:104432888-104435461		chr14:94184644-94184644
chr12:106163698-106170377		chr14:95873606-95873606
chr12:114146001-114147102		chr14:105608092-105608092
chr13:12274966-12279274		chr1:237063718-237063718
chr13:12358682-12361763		chr1:236927931-236927931
chr13:43633758-43637045	chr6:13786803-13786803
chr13:45645111-45652426		chr6:16299343-16299343
chr13:58101565-58106539		chr5:136953189-136953189
chr13:62469694-62470225		chr19:12061578-12061578
chr13:62704931-62706552		chr19:12061578-12061578
chr13:93915868-93917548		chr5:78982471-78982471
chr13:96724540-96731237		chr5:75629781-75629781
chr13:104529236-104533646		chr5:65479443-65479443
chr13:105735958-105741573	chr5:63910493-63910493
chr13:115743311-115750300	chr5:52255041-52255041
chr13:117639642-117643999		chr5:50142356-50142356
chr5:22922433-22938742		chr7:104622546-104622546
chr5:40000227-40005604		chr4:11394774-11394774
chr5:76638889-76645726	chr4:56294085-56294085
chr5:92870318-92873274		chr4:77079890-77079890
chr5:97522281-97524939		chr4:79839096-79839096
chr5:112813355-112814774		chr22:26840981-26840981
chr5:123181154-123184069		chr12:121675497-121675497
chr5:128261980-128264134		chr12:129556270-129556270
chr5:129263654-129266700		chr12:130880682-130880682
chr5:135178450-135179653		chr7:73484008-73484008
chr5:136742310-136750663		chr7:101901513-101901513
chr5:149682004-149687716		chr13:30776767-30776767
chr6:23212078-23213545		chr7:121958481-121958481
chr6:25687807-25694583		chr7:124462455-124462455
chr6:36664914-36665709		chr7:136912111-136912111
chr6:36787102-36797378	chr7:137065879-137065879
chr6:38637493-38648136		chr7:139246316-139246316
chr6:52718047-52720200		chr7:27870192-27870192
chr6:59290909-59303025	chr4:90158190-90158190
chr6:72790604-72792865	chr2:85283073-85283073	chr2:85282560-85282560
chr6:84521400-84524263		chr2:72356367-72356367
chr6:88495099-88497718		chr3:127706514-127706514
chr6:97101926-97105350		chr3:69068980-69068980
chr6:99571959-99577003		chr3:71728440-71728440
chr6:113693814-113698274		chr3:10365707-10365707
chr6:118451378-118453043		chr10:27293227-27293227
chr6:118537251-118543912		chr12:2807115-2807115
chr6:127074992-127080355		chr12:4414516-4414516
chr7:16556020-16557129		chr19:48206534-48206534
chr7:30945487-30946758		chr19:36729673-36729673
chr7:38257140-38258851		chr19:31048965-31048965
chr7:52132127-52134789	chr19:50343650-50343650
chr7:85445576-85447517		chr15:88520598-88520598
chr7:87493962-87496587		chr15:91465814-91465814
chr7:87855694-87858720		chr15:91045475-91045475
chr7:104874051-104875137		chr11:77321400-77321400
chr7:105735033-105739202		chr11:76264069-76264069
chr7:106033516-106036402	chr11:75855289-75855289
chr7:109267936-109268970		chr11:3696241-3696241
chr7:112952283-112958373	chr11:6696795-6696795
chr7:117957023-117960070		chr11:10533225-10533225
chr7:125524332-125525372		chr16:19279652-19279652
chr7:130618904-130623366		chr16:25247326-25247326
chr7:134415371-134416077		chr16:30454952-30454952
chr7:134585658-134587470		chr16:30613879-30613879
chr7:148038343-148040357		chr11:203485-203485
chr8:5083220-5086158		chr13:103696350-103696350
chr8:8665359-8667254		chr13:107194021-107194021
chr8:10984676-10987012		chr13:110406184-110406184
chr8:24281777-24285026		chr8:41482520-41482520
chr8:35889496-35894691		chr8:9639856-9639856
chr8:46325028-46326804		chr4:187210835-187210835
chr8:49311018-49313802		chr4:183724177-183724177
chr8:63990170-63992151		chr4:169849568-169849568
chr8:71656712-71659404		chr8:20103676-20103676
chr8:72534307-72543487		chr12:120720632-120720632
chr8:96539225-96543585		chr16:56463068-56463068
chr8:106872087-106876499		chr16:66648653-66648653
chr8:113677193-113681796		chr16:74481328-74481328
chr8:114386979-114390268		chr16:75476952-75476952
chr8:119092627-119099031	chr16:80631790-80631790
chr9:4477435-4478822		chr11:105783836-105783836
chr9:9658808-9661365		chr11:100229616-100229616
chr9:14584056-14585596		chr11:94232749-94232749
chr9:14806559-14810584	chr11:93918773-93918773
chr9:24525620-24529898	chr7:35237136-35237136
chr9:42059654-42063427	chr11:121184133-121184133
chr9:51917668-51923513		chr11:110042564-110042564
chr9:53245098-53247853		chr11:108239826-108239826
chr9:69936307-69938576		chr15:59815748-59815748
chr9:73327219-73328679		chr15:54920806-54920806
chr9:76335324-76338590	chr6:54809856-54809856
chr9:79616051-79619095		chr6:75962649-75962649
chr9:81521911-81525001	chr6:78168959-78168959
chr9:86659198-86660627		chr6:84262614-84262614
chr9:95605493-95607161		chr3:142526730-142526730
chr9:108107177-108109592		chr3:49573048-49573048
chr9:110954317-110957852		chr3:46454488-46454488
chr9:122757791-122761034		chr3:44482406-44482406
chr9:122981451-122987283		chr3:44961470-44961470
chrX:33962517-33963865		chrX:118212598-118212598
chrX:35752810-35755318	chrX:119560011-119560011
chrX:45523376-45526704		chrX:128937264-128937264
chrX:48466656-48474186		chrX:131506029-131506029
chrX:49403535-49406700		chrX:132434131-132434131
chrX:72415752-72418196		chrX:154064070-154064070
chrX:91000634-91010566	chrX:24568583-24568583
chrX:136476057-136480278	chrX:106305255-106305255
chrX:147079301-147079971		chrX:54957864-54957864
chrX:163679295-163680688		chrX:12941288-12941288
chr15:8239814-8241227		chr5:37066515-37066515
chr15:12958498-12963957		chr5:31329253-31329253
chr15:26470218-26472841		chr5:15939900-15939900
chr15:41695650-41697423		chr8:107771711-107771711
chr15:53285308-53293751		chr8:119201698-119201698
chr15:55467923-55470892		chr8:121547985-121547985
chr15:58007413-58013023		chr8:124510129-124510129
chr15:58145097-58146384	chr8:124656664-124656664
chr15:58612864-58616466	chr8:125323155-125323155
chr15:63918383-63921011		chr8:131064353-131064353
chr15:65817943-65826735	chr8:133133090-133133090
chr15:75575910-75577275		chr8:144510230-144510230
chr15:76681708-76683425		chr8:145946514-145946514
chr15:78309611-78311908		chr22:37521878-37521878
chr15:78497766-78502306		chr22:37764001-37764001
chr15:78581729-78587010	chr22:37860587-37860587
chr15:82501723-82519661		chr22:42536214-42536214
chr15:100222466-100225646		chr12:51379775-51379775
chr14:32511964-32515208		chr3:15708746-15708746
chr14:33189035-33189785		chr10:50903153-50903153
chr14:37933339-37935330	chr10:85914218-85914218
chr14:41716789-41721349		chr10:82282387-82282387
chr14:55250149-55250952		chr14:23516279-23516279
chr14:58196371-58201110		chr13:21353014-21353014
chr14:60257362-60266666		chr13:26599989-26599989
chr14:60836905-60838828		chr13:25916544-25916544
chr14:64138472-64142905		chr8:11185646-11185646
chr14:65811272-65821558		chr8:28431775-28431775
chr14:76159915-76162458		chr13:45967462-45967462
chr14:78220475-78226206	chr13:43684810-43684810
chr14:93412794-93414733		chr13:66876967-66876967
chr14:100265413-100274354		chr13:74260226-74260226
chr17:10395439-10402482		chr6:163999628-163999628
chr17:17658355-17666715		chr5:96373214-96373214
chr17:25397434-25399375		chr16:1377019-1377019
chr17:33018739-33019618		chr19:12187968-12187968
chr17:56690817-56700628		chr19:5558178-5558178
chr17:66315031-66319494	chr18:9285989-9285989	chr18:9285206-9285206
chr17:74364267-74367048		chr2:31749656-31749656
chr17:84229971-84230985	chr2:42992863-42992863
chr17:90432754-90436419		chr2:50145646-50145646
chr16:4081318-4084050		chr16:3775055-3775055
chr16:4284698-4287900		chr16:4012657-4012657
chr16:14109249-14111625		chr16:15688245-15688245
chr16:14298511-14300225		chr16:15959576-15959576
chr16:22466622-22469324		chr3:185864990-185864990
chr16:23468432-23469922		chr3:186951870-186951870
chr16:38597218-38601540		chr3:119139561-119139561
chr16:43965144-43969261		chr3:113681829-113681829
chr16:78540563-78545365		chr21:19161284-19161284
chr16:85450084-85457762		chr21:27838528-27838528
chr16:85856712-85862857		chr21:28290231-28290231
chr16:96812656-96814668		chr21:41382926-41382926
chr19:10137246-10138755		chr11:61634819-61634819
chr19:10530054-10530929		chr11:61278482-61278482
chr19:16686671-16691357		chr9:80032541-80032541
chr19:16707050-16707574		chr9:80000107-80000107
chr19:23280930-23283320		chr9:72969804-72969804
chr19:24334597-24336395		chr9:71689129-71689129
chr19:24549834-24550994		chr9:71396645-71396645
chr19:30638999-30643730		chr10:54058110-54058110
chr19:32057214-32061250	chr10:52519033-52519033
chr19:32746218-32748736		chr10:89511269-89511269
chr19:37093810-37099352	chr10:93806438-93806438
chr19:40366509-40369541		chr10:97071528-97071528
chr19:41672293-41674943		chr10:98757795-98757795
chr19:43921324-43922585		chr10:101635334-101635334
chr19:45891845-45893378		chr10:103605356-103605356
chr19:46105990-46107603	chr10:103866339-103866339
chr19:46602757-46605831	chr10:104433482-104433482
chr1:8349817-8353558	chr8:51709073-51709073
chr1:16553843-16561352		chr8:74704598-74704598
chr1:16985004-16987562		chr8:75146935-75146935
chr1:36196869-36201073		chr2:128953247-128953247
chr1:38232179-38236296		chr2:100163718-100163718
chr1:51519807-51528091		chr20:21736171-21736171
chr1:54452811-54454726		chr2:197627756-197627756
chr1:71289003-71289873		chr2:215796266-215796266
chr1:80260201-80263733		chr2:225334869-225334869
chr1:84900214-84903855		chr2:230899698-230899698
chr1:98712865-98715526		chr5:101569690-101569690
chr1:121549035-121556410	chr2:120742445-120742445
chr1:134882804-134888235		chr1:204527248-204527248
chr1:138739130-138742042		chr1:200146552-200146552
chr1:140380394-140383579		chr1:198291550-198291550
chr1:158354670-158361192		chr1:179327815-179327815
chr1:164601897-164603535		chr1:171562650-171562650
chr1:169153008-169153960		chr1:165880855-165880855
chr1:170083652-170088865		chr1:164821067-164821067
chr1:172228338-172231279		chr1:162356600-162356600
chr1:173102841-173104516		chr1:161255240-161255240
chr1:174250613-174252996		chr1:160060353-160060353
chr1:176989181-176989877		chr1:240938815-240938815
chr1:177612349-177616621		chr1:241792155-241792155
chr1:191941920-191947101		chr1:214214853-214214853
chr1:196921483-196930058		chr1:207813992-207813992
chr18:10063713-10066048		chr18:18529701-18529701
chr18:21283351-21287628		chr18:29843506-29843506
chr18:35809984-35811823	chr5:138726325-138726325
chr18:46661385-46664736		chr5:114856608-114856608
chr18:56934788-56935606		chr5:126205883-126205883
chr18:60844138-60848374		chr5:149937773-149937773
chr18:61451079-61458339		chr5:149234585-149234585
chr18:61651297-61654496		chr5:149014531-149014531
chr18:71413297-71418646		chr18:51062269-51062269
chr18:73794428-73799914		chr18:48611415-48611415
chr18:77870206-77873880		chr18:43846954-43846954
chr18:80323043-80324436		chr18:77898234-77898234
chr2:6019901-6021384		chr10:11914276-11914276
chr2:17264284-17270323		chr10:21068902-21068902
chr2:29049483-29050343		chr9:135118220-135118220
chr2:30327036-30328313		chr9:131937835-131937835
chr2:65151739-65154829		chr2:165752696-165752696
chr2:72929520-72931666		chr2:174937175-174937175
chr2:75823868-75829191	chr2:178487977-178487977
chr2:84711445-84712105		chr11:57245007-57245007
chr2:90980177-90980760		chr11:47348737-47348737
chr2:104667203-104672738		chr11:32879669-32879669
chr2:118530732-118534737		chr15:40576457-40576457
chr2:130893546-130895590		chr20:3667619-3667619
chr2:156836174-156844091		chr20:35405852-35405852
chr2:177171107-177171831		chr19:12061578-12061578
chr2:180400622-180404072		chr20:61518566-61518566
chr3:17961705-17972459		chr8:65500320-65500320
chr3:32842839-32849593		chr3:179512746-179512746
chr3:36347134-36348268	chr4:122588599-122588599	chr4:122589110-122589110
chr3:62271921-62274486	chr3:153989609-153989609
chr3:79616473-79617987		chr4:159176439-159176439
chr3:82844044-82846327	chr4:155494379-155494379
chr3:84245660-84248391		chr4:153900838-153900838
chr3:97492556-97494737		chr9:74722735-74722735
chr3:122634448-122636642		chr4:120216672-120216672
chr3:127571963-127573675		chr4:113110237-113110237
chr3:130991352-130994049		chr4:108874613-108874613
chr3:141902532-141905646		chr4:95589377-95589377
chr3:144349859-144354391		chr1:87213867-87213867
chr3:151460209-151464590		chr1:79005434-79005434
chr3:151845920-151848113		chr1:78483648-78483648
chr4:3825996-3830839		chr8:57073463-57073463
chr4:9540276-9549012	chr8:62568539-62568539
chr4:33257383-33261303		chr6:89875284-89875284
chr4:46517971-46519766		chr9:100846637-100846637
chr4:48203591-48207482	chr9:102740733-102740733	chr9:102741461-102741461
chr4:74917748-74923611		chr9:7796490-7796490
chr4:94233588-94236040	chr9:26903373-26903373
chr4:104701793-104708699		chr1:57181008-57181008
chr4:138446963-138451655		chr1:20239438-20239438
chr4:142717358-142721611		chr1:14114554-14114554
